# Supplementary material for: Ultra-Sensitive Room-Temperature Ammonia Detection Enabled by MEMS-Based 0D/1D/2D PA10Mo2 Nanocomposites
Source: Research Square preprint supplement (doi:10.21203/rs.3.rs-6704267/v1), 2025-06-18
Supplement: Supplementary file 1 [file 38868507200a680cacbc87ff.docx]

**Supporting Information**

**Ultra-Sensitive Room-Temperature Ammonia Detection Enabled by MEMS-Based 0D/1D/2D PA10Mo₂ Nanocomposites**

Ping Luo a,b, Wenfeng Shen b,c,d,e*, Jin Zhang b,f, Dawu Lv b,c, Ruiqin Tan g*, Weijie Song b,c*

a School of Chemistry and Chemical Engineering, Jiangxi University of Science and Technology, Ganzhou, Jiangxi 341000, China

b Zhejiang Provincial Engineering Research Center of Energy Optoelectronic Materials and Devices, Ningbo Institute of Material Technology and Engineering, Chinese Academy of Sciences, Ningbo, Zhejiang 315201, China

c Center of Materials Science and Optoelectronics Engineering, University of Chinese Academy of Sciences, Beijing, 100049, China

d CS-Microsensor (Ningbo) Technology Co. Ltd., Ningbo, Zhejiang, 311121, China

e Research and Manufacturing Base of Olfactory Sensors in China Sensing Valley, Bengbu 233040, China

f Ningbo No.2 Hospital, Ningbo, Zhejiang 315099, China

g Faculty of Electrical Engineering and Computer Science, Ningbo University, Ningbo, Zhejiang 315211, China


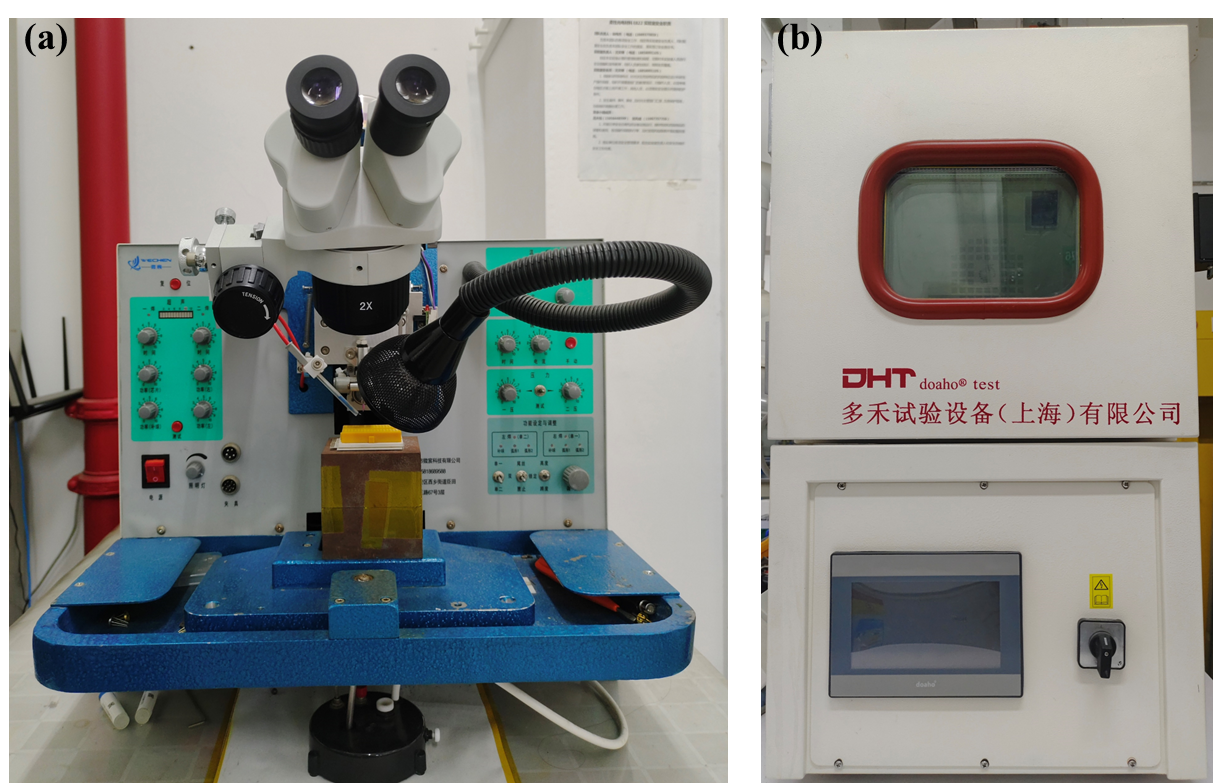


**Fig. S1** **(a)** The ultrasonic gold wire welding machine; **(b)** The climate Test Chamber.


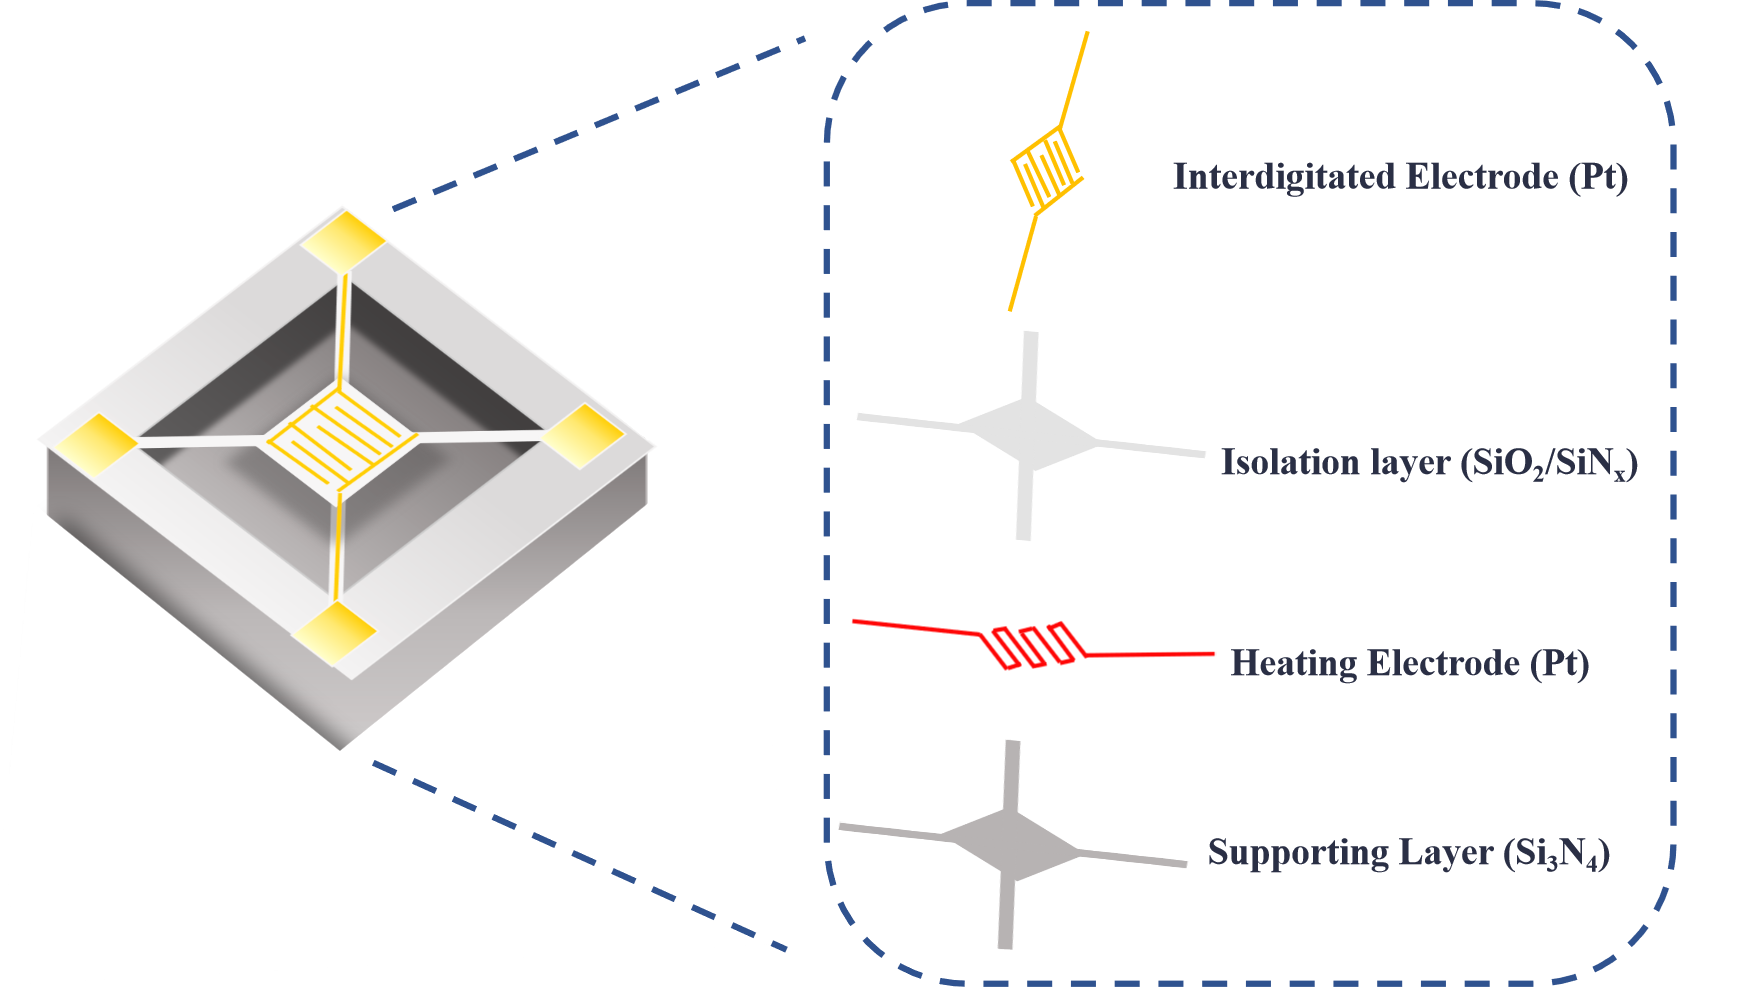


**Fig. S2.** MEMS chip structure.

**
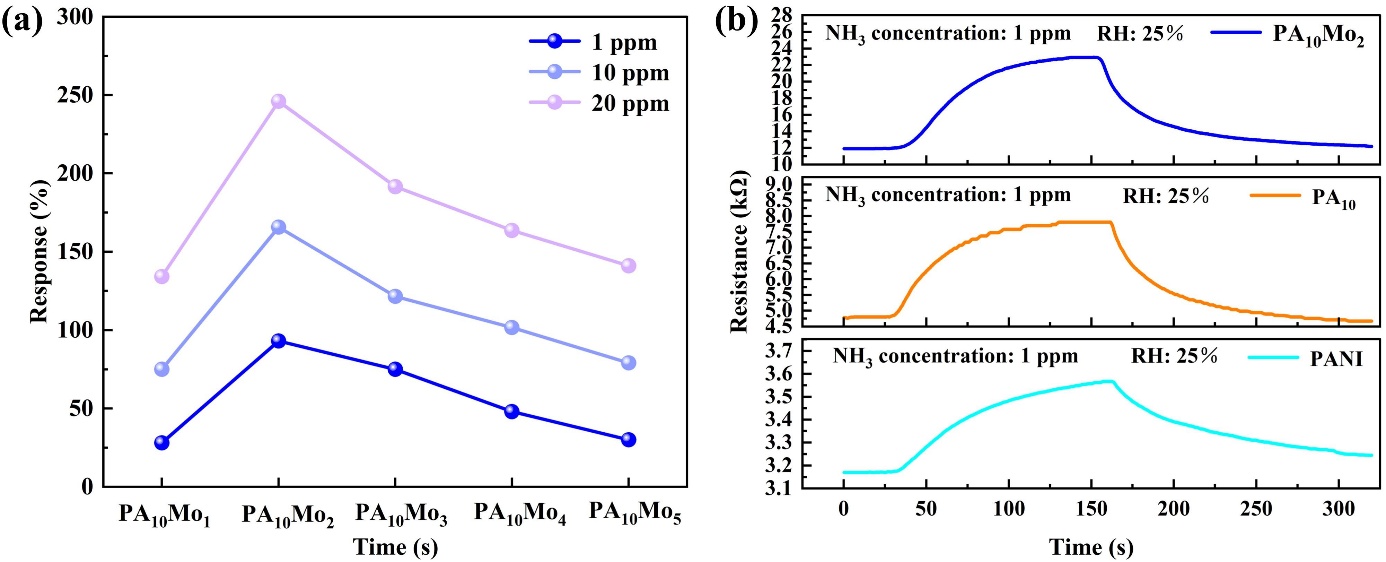
**

**Fig. S3 (a)** Ammonia response curves of PA10Mo1, PA10Mo2, PA10Mo3, PA10Mo4, PA10Mo5 at 1 ppm, 10 ppm, and 20 ppm; **(b)** The resistance curve of PA10Mo2, PA10 andPANI for 1ppm ammonia gas.


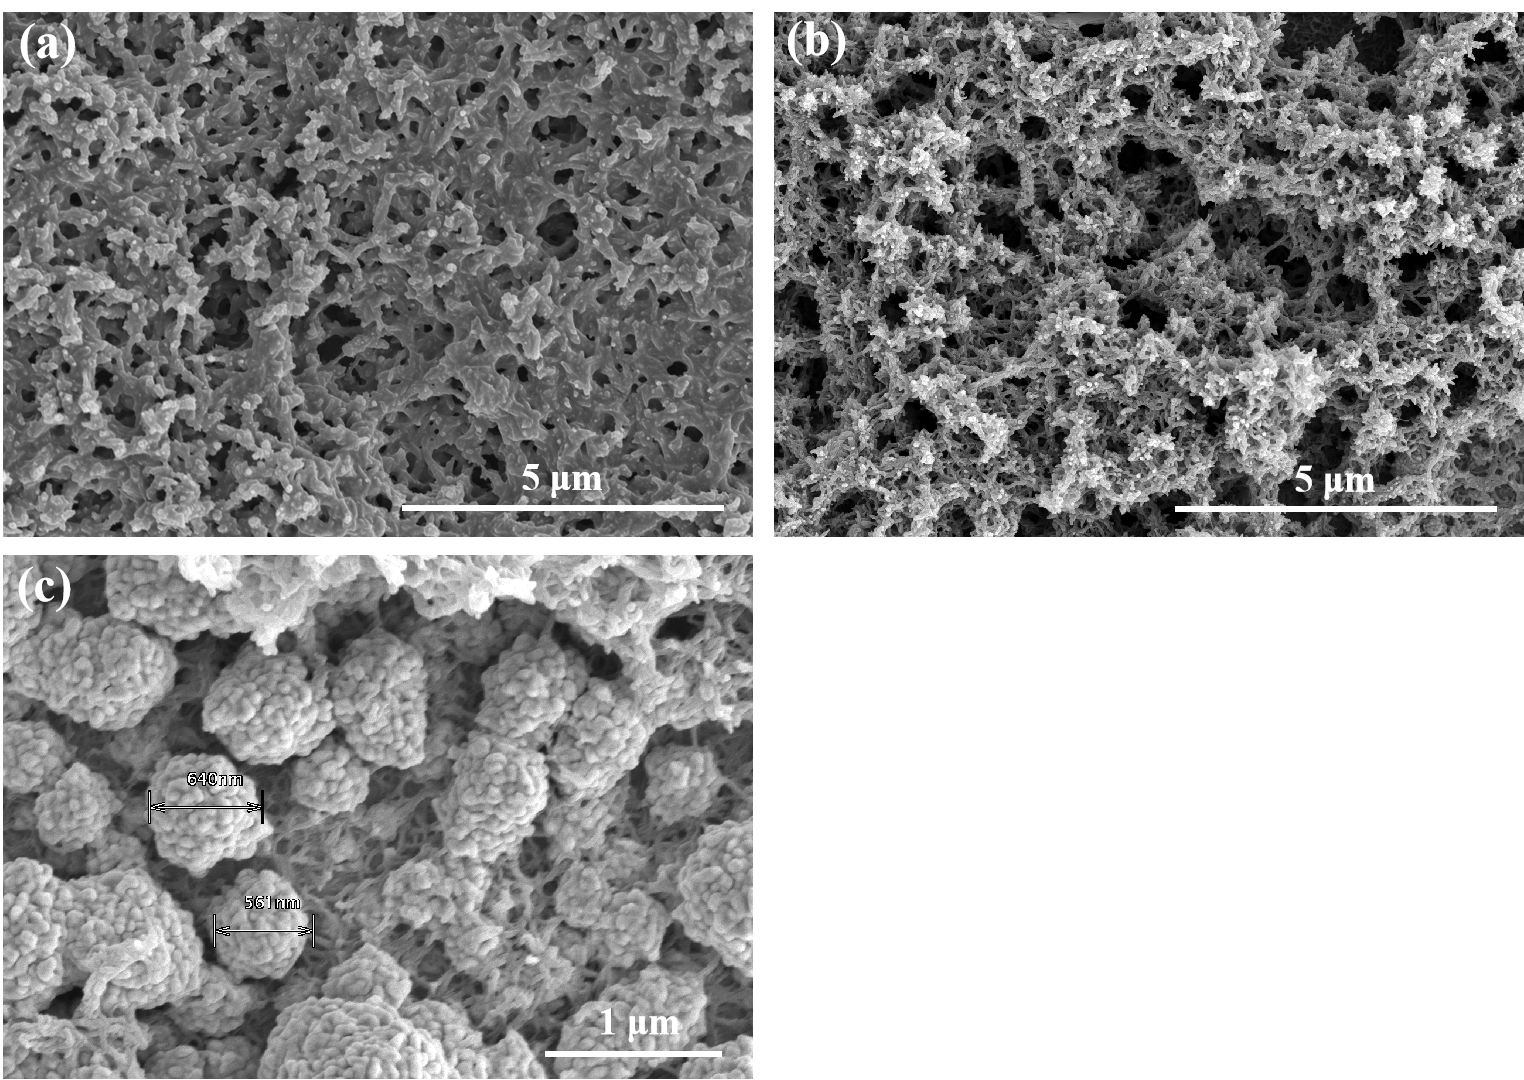


**Fig. S4** SEM images of **(a)** PANI; **(b)** PA10; **(c)** Au in PA10.


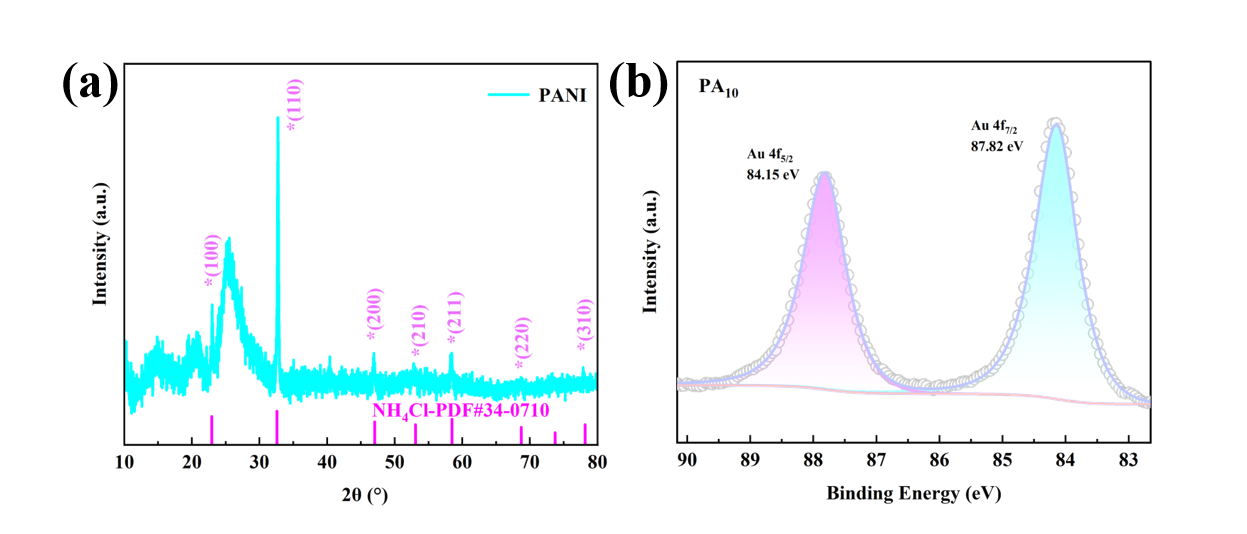
 **Fig. S5** **(a)** Full XRD Pattern of PANI; **(b)** XPS of Au in PANI.

**Table S1 Comparison of the performances of the flexible PA10Mo2 sensor prepared in this work and the other NH3 sensors reported recently.**

| Material | Method | Response (%) | Tres/Trec | LOD | Long-term stability | Ref. |
| --- | --- | --- | --- | --- | --- | --- |
| PANI/LIG | laser direct writing＋spraying | 68@60 ppm | 53/167 s | 14.6  ppb | 31 days | [15] |
| Au-In2O3@PANI | Hydrothermal+ in-situ | 46@100 ppm | 118 /144 s | 500 ppb | - | [29] |
| Au@SiO2-PANI | droplet-evaporation self-assembly＋in-situ | 0.8@10 ppm | 35 /133 s | 10 ppb | 30 days | [30] |
| HE-MOF-1 | mild solvothermal | 55@1 ppm | 38.9/40.9 s | - | 30 days | [31] |
| ZP1 | in aqueous | 89@5 ppm | 31/12 s | ＜1 ppm | 60 days | [32] |
| PANI/WS2 | in situ | 277@5 ppm | 108/229 s | 100 ppb | 30 days | [33] |
| PANI/MoS2/SnO2 | electrostatic spinning＋hydrothermal＋in-situ | 990@100 ppm | 21/130 s (20 ppm) | 200 ppb | 7 days | [34] |
| PA10Mo2 | in-situ | 92.5@1 ppm | 69/89 s | 0.45 ppb | 30 days | This work |
